# Supplementary material for: Natural flavonoid hesperetin blocks amyloid β-protein fibrillogenesis, depolymerizes preformed fibrils and alleviates cytotoxicity caused by amyloids
Source: Royal Society of Chemistry journal article supplement (doi:10.1039/d3fo05566c), 2024-01-01
Supplement: d3fo05566c1.pdf [file d3fo05566c1.pdf]

## Supporting Information

# Natural flavonoid hesperetin blocks amyloid $\beta$ -protein fibrillogenesis, depolymerizes preformed fibrils and alleviates amyloid-caused cytotoxicity

Qinchen Dong,<sup>a1</sup> Zhan Cui,<sup>a1</sup> Xinming Wu,<sup>a</sup> Li Li,<sup>b</sup> Fuping Lu,<sup>a</sup> Fufeng Liu<sup>a\*</sup>

<sup>a</sup> Key Laboratory of Industrial Fermentation Microbiology, Ministry of Education, Tianjin, 300457, P. R. China; Tianjin Key Laboratory of Industrial Microbiology, Tianjin, 300457, P. R. China; College of Biotechnology, Tianjin University of Science and Technology, Tianjin 300457, P. R. China;

<sup>b</sup> College of Sciences, Tianjin University of Science and Technology, Tianjin 300457, P. R. China.

<sup>1</sup>Qinchen Dong and Zhan Cui contributed equally to this work.

### Corresponding Author

\*F.-F. Liu, Phone: +86-022-60602717; Fax: +86-022-60602298; E-mail:  
[fufengliu@tust.edu.cn](mailto:fufengliu@tust.edu.cn);

**Figure S1**

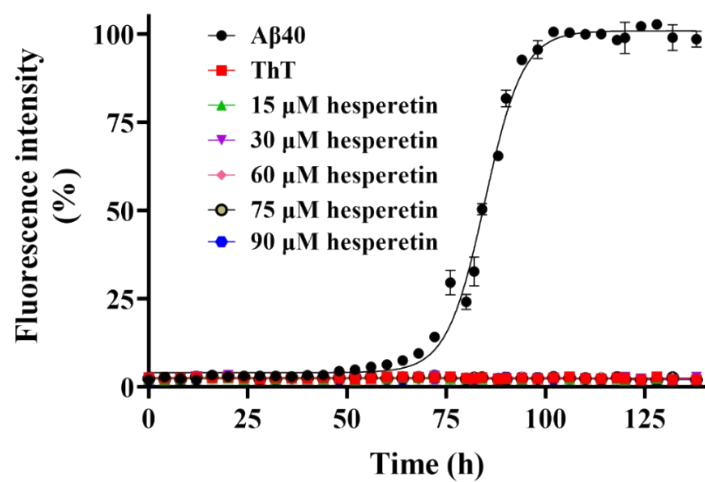

**Figure S1** Effect of different concentrations of hesperetin on ThT fluorescence intensity. ThT without hesperetin and Aβ40 was negative control, while 30 μM ThT and 30 μM Aβ40 were positive control.

**Figure S2**

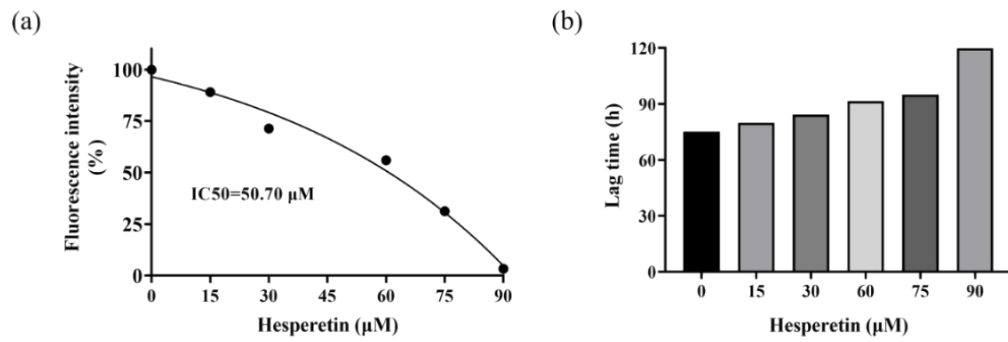

**Figure S2** (a) The half-maximal inhibitory concentration (IC<sub>50</sub>) of hesperetin against A $\beta$ 40 fibrillation. (b) The lag time of A $\beta$ 40 kinetics curve with and without different concentrations of hesperetin.

**Figure S3**

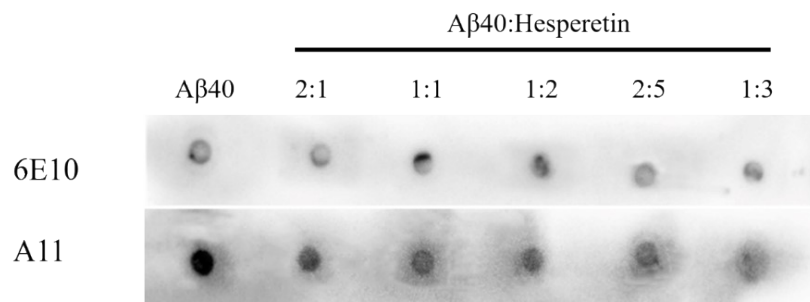

**Figure S3** Dot blot of Aβ40 co-cultured with hesperetin. From left to right, Aβ40 treated with different concentrations of 0, 15, 30, 60, 75 and 90 μM hesperetin.

**Figure S4**

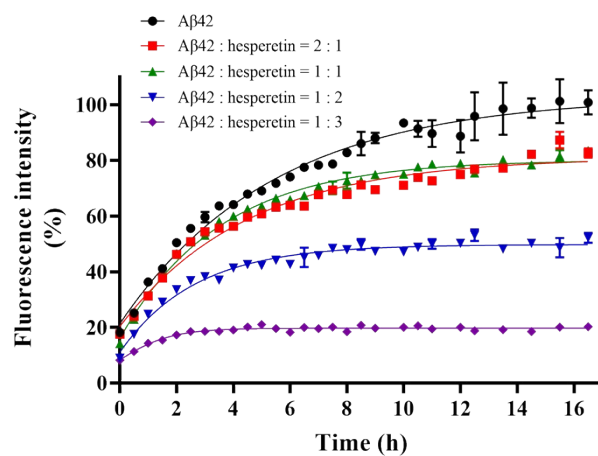

**Figure S4** ThT fluorescence of different concentrations of hesperidin co-cultured with Aβ42.

**Figure S5**

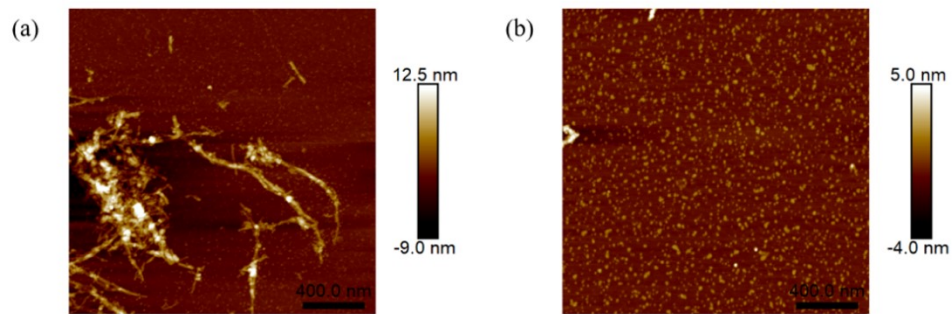

**Figure S5** AFM images of Aβ42 co-cultured with hesperetin 30 μM Aβ42 was cultured to plateau stage with (b) or without (a) 90 μM hesperetin, scale:400 nm.

**Figure S6**

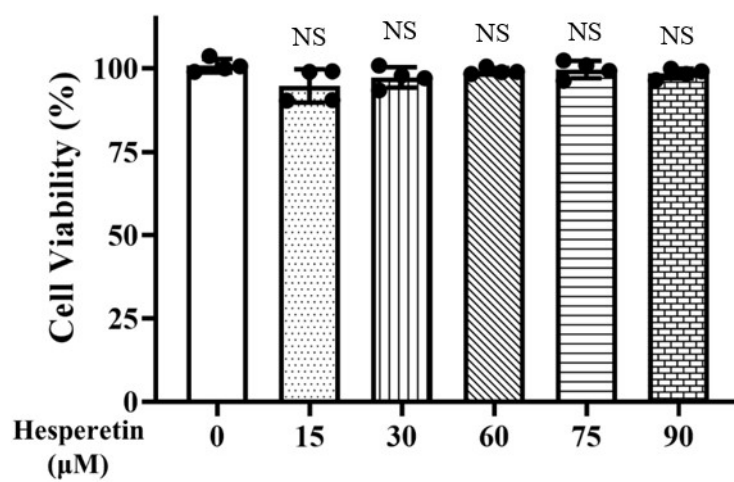

**Figure S6** Cytotoxicity of hesperetin at different concentrations. NS, not significant.

Figure S7

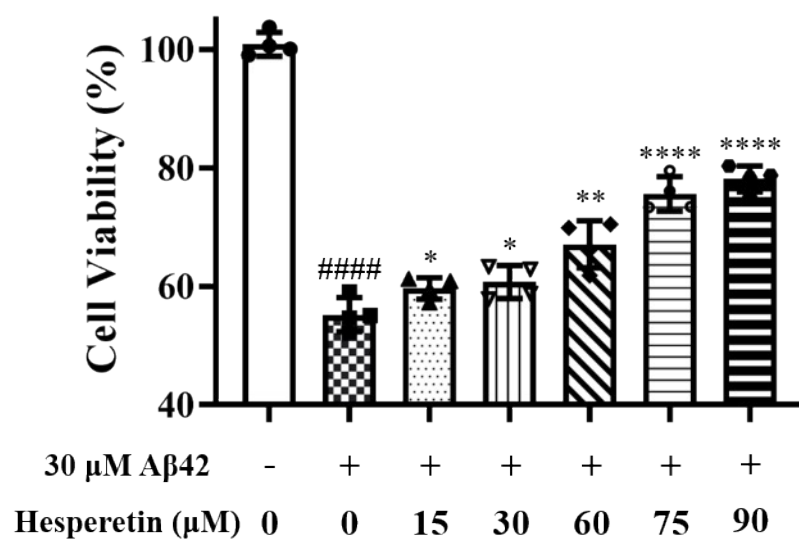

Figure S7 Cytotoxicity of different concentrations of A $\beta$ 42 co-cultured with hesperetin.



**Figure S8**

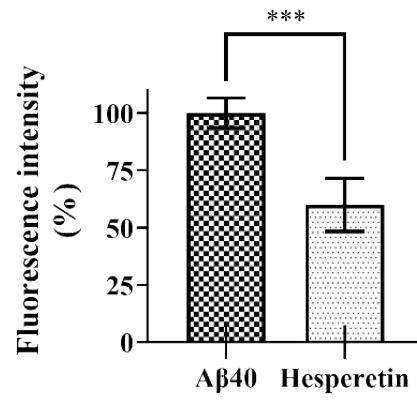

**Figure S8** Quantitative fluorescence analysis of PI-DNA in PC12 cells induced by Aβ40 aggregates.

**Figure S9**

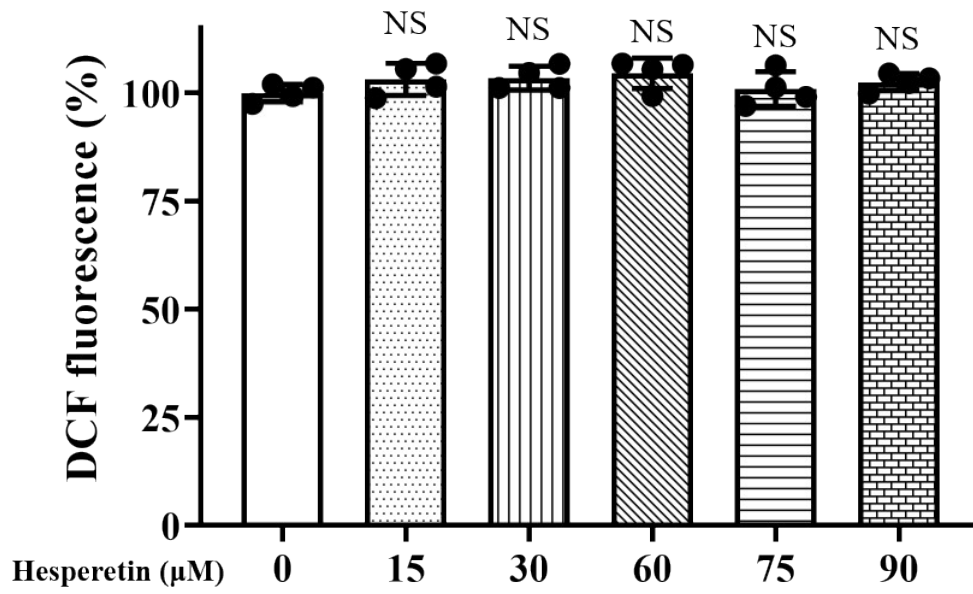

**Figure S9** The effect of hesperetin at different concentrations on ROS level.

Figure S10

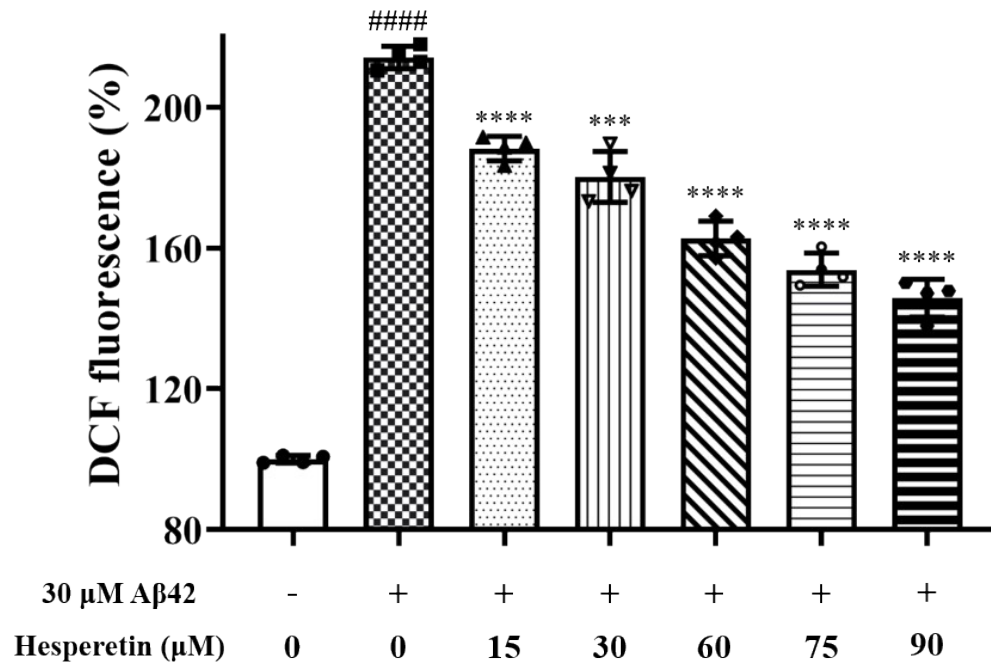

Figure S10 Oxidative stress of different concentrations of hesperetin co-cultured with A $\beta$ 42.

**Figure S11**

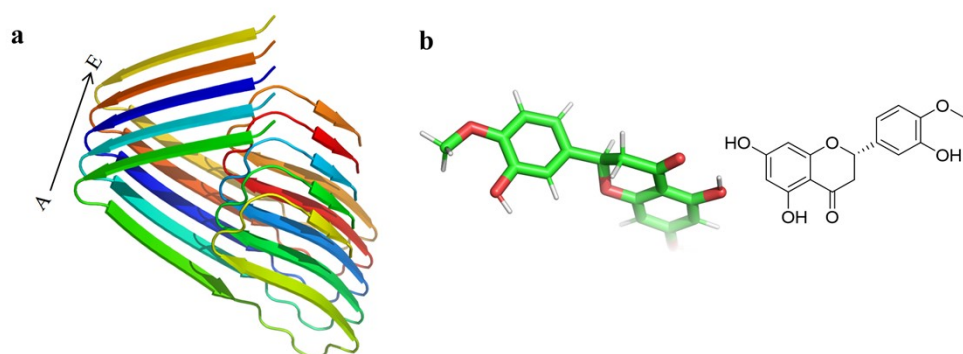

**Figure S11** The fibrillary structure of Aβ42 pentamer and hesperetin. (a) The three-dimensional structure of Aβ42 pentamer. (b) The three-dimensional structure (left) and structural formula (right) of hesperetin.

**Figure S12**

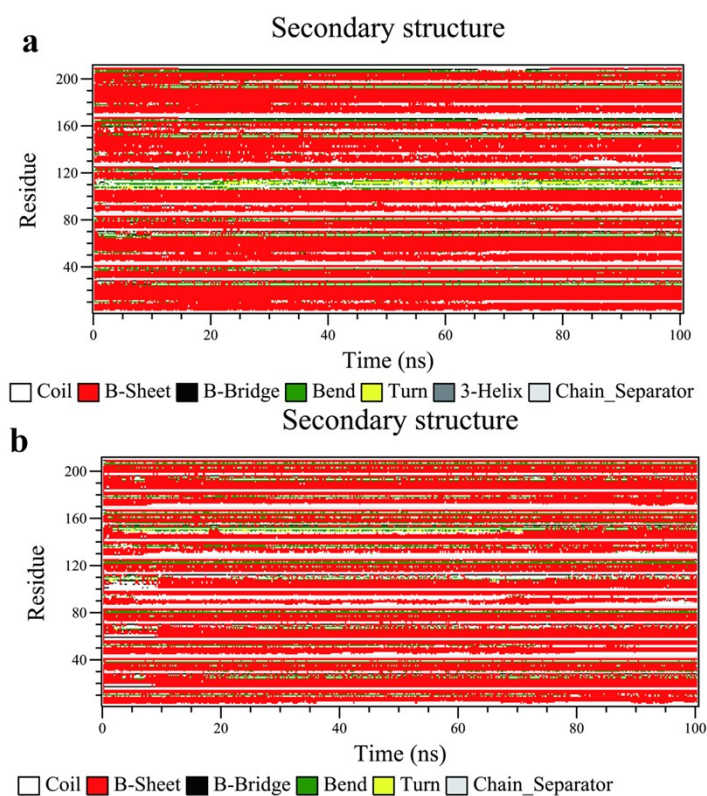

**Figure S12** The changes of secondary structure of A $\beta$ 42 pentamer in the absence (a) and presence of hesperetin (b).

**Figure S13**

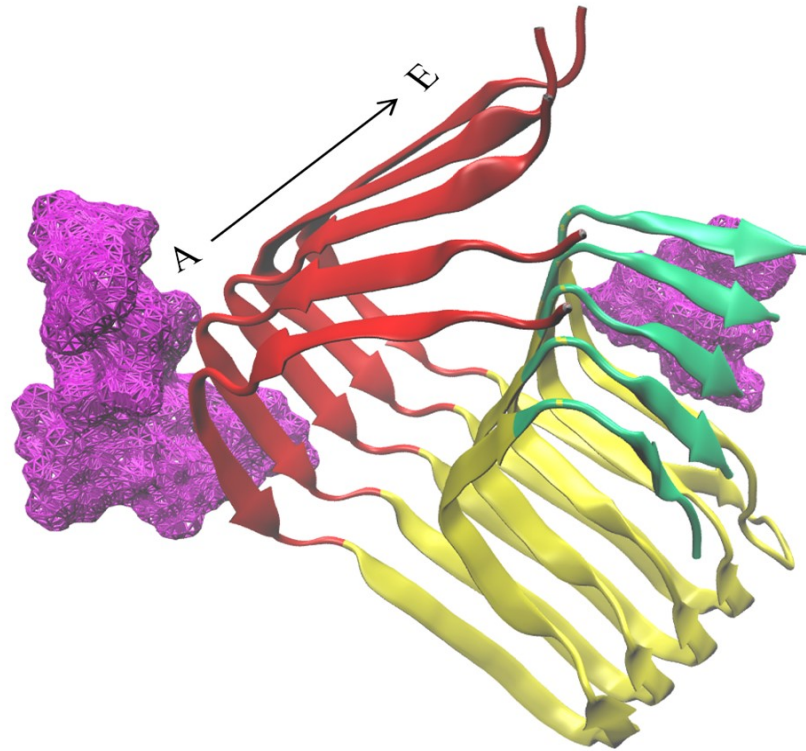

**Figure S13** A typical configuration of the spatial distribution of hesperetin on A $\beta$ 42 pentamer. Among them, the A $\beta$ 42 pentamer is divided into three parts, the R1 region (Red) including residues D1–Q15; the R2 region (Yellow) formed by residues I16–G37 and the R3 region (Green) formed by residues G38–A42. In addition, hesperetin is expressed in purple Wireframe mode.

**Figure S14**

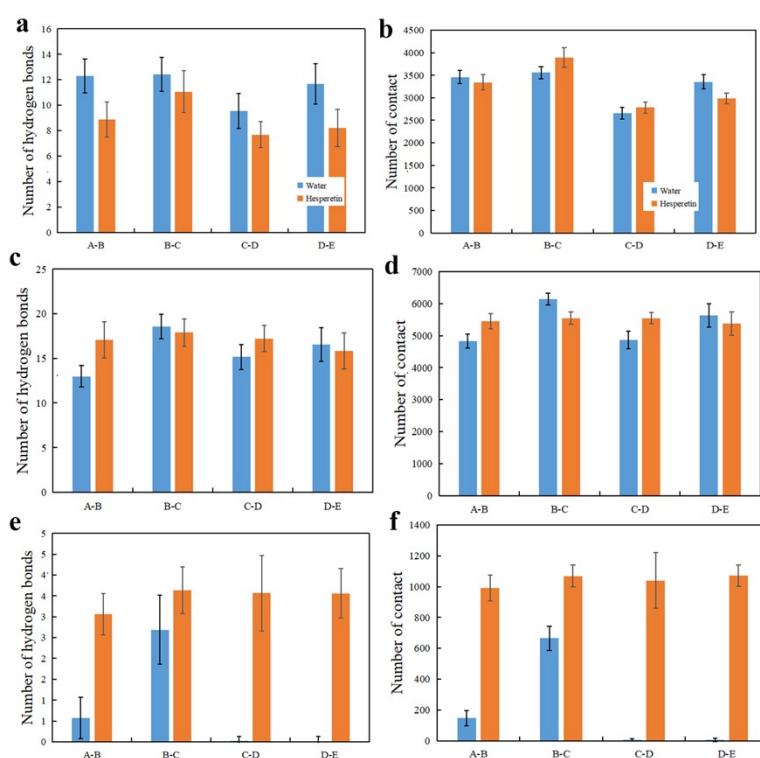

**Figure S14** 100 ns simulation period, the number of hydrogen bonds and the number of contacts between Aβ42 pentamer in aqueous solution and hesperetin system. The number of hydrogen bonds of the R1 region (a), the R2 region (c) and the R3 region (e). The number of contacts of the R1 region (b), the R2 region (d) and the R3 region (f).

**Figure S15**

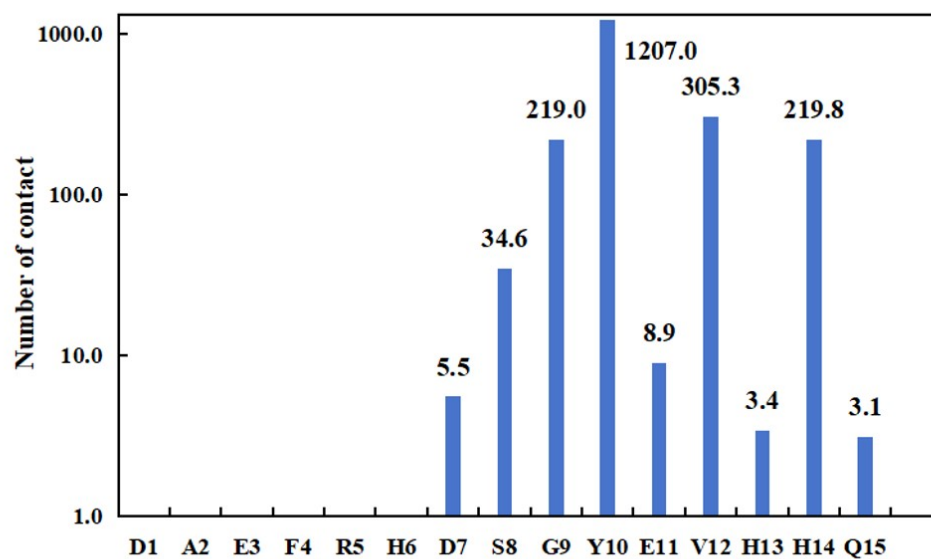

**Figure S15** 100 ns simulation period, the average number of contacts between each amino acid in the R1 region of A $\beta$ 42 pentamer and hesperetin system in aqueous solution.
